# Supplementary material for: Refgenie: a reference genome resource manager
Source: PubMed Central journal article supplement (PMC6988606; doi:10.1093/gigascience/giz149), 2020-01-29
Supplement: giz149_response_to_reviewer_comments_original_submission.pdf [file giz149_response_to_reviewer_comments_original_submission.pdf]

# Author's Response To Reviewer Comments

Close

Response to review is included as a PDF cover letter for ease of review.

Close
